# Supplementary material for: Quantum versus classical unimolecular fragmentation rate constants and activation energies at finite temperature from direct dynamics simulations
Source: Royal Society of Chemistry journal article supplement (doi:10.1039/d2cp03809a), 2022-01-01
Supplement: d2cp03809a1.pdf [file d2cp03809a1.pdf]

# Quantum versus Classical Unimolecular Fragmentation Rate Constants and Activation Energies at Finite Temperature from Direct Dynamics Simulations

Federica Angiolari,<sup>†</sup> Simon Huppert,<sup>‡</sup> and Riccardo Spezia<sup>\*,†</sup>

<sup>†</sup>*Sorbonne Université, Laboratoire de Chimie Théorique, UMR 7616 CNRS, 4 Place  
Jussieu, 75005 Paris (France).*

<sup>‡</sup>*Sorbonne Université, Institut de Nanosciences de Paris, UMR 7588 CNRS, 4 Place  
Jussieu, 75005 Paris (France)*

E-mail: riccardo.spezia@sorbonne-universite.fr

## S1 Algorithm

Here we report the details of the algorithm used to propagate RPMD trajectories, as discussed by Ceriotti and co-workers in their original work.<sup>1</sup>

$$p_i^j \leftarrow p_i^j - \Delta t \frac{\partial V(q_1^j \dots q_N^j)}{\partial q_i^j} \quad (1)$$

$$\tilde{p}_i^k = \sum_{j=1}^P p_i^j C_{jk} \quad \tilde{q}_i^k = \sum_{j=1}^P q_i^j C_{jk} \quad (2)$$

$$\begin{bmatrix} \tilde{p}_i^k \\ \tilde{q}_i^k \end{bmatrix} \leftarrow \begin{bmatrix} \cos \omega_k \frac{\Delta t}{2} & -m_i \omega_k \sin \omega_k \frac{\Delta t}{2} \\ \left[ \frac{1}{m_i \omega_k} \right] \sin \omega_k \frac{\Delta t}{2} & \cos \omega_k \frac{\Delta t}{2} \end{bmatrix} \begin{bmatrix} \tilde{p}_i^k \\ \tilde{q}_i^k \end{bmatrix} \quad (3)$$

$$\tilde{p}_i^k \leftarrow c_1^k \tilde{p}_i^k + \sqrt{\frac{m_i}{\beta_P}} c_2^k \eta_i^k \quad (4)$$

$$\begin{bmatrix} \tilde{p}_i^k \\ \tilde{q}_i^k \end{bmatrix} \leftarrow \begin{bmatrix} \cos \omega_k \frac{\Delta t}{2} & -m_i \omega_k \sin \omega_k \frac{\Delta t}{2} \\ \left[ \frac{1}{m_i \omega_k} \right] \sin \omega_k \frac{\Delta t}{2} & \cos \omega_k \frac{\Delta t}{2} \end{bmatrix} \begin{bmatrix} \tilde{p}_i^k \\ \tilde{q}_i^k \end{bmatrix} \quad (5)$$

$$p_i^j = \sum_{k=0}^{P-1} C_{jk} \tilde{p}_i^k \quad q_i^j = \sum_{k=0}^{P-1} C_{jk} \tilde{q}_i^k \quad (6)$$

Where  $\eta$  is a random gaussian number and:

$$c_1^k = e^{-\Delta t \gamma^k} \quad (7)$$

$$c_2^k = \sqrt{1 - [c_1^k]^2} \quad (8)$$

## S2 Temperature Correlation Function

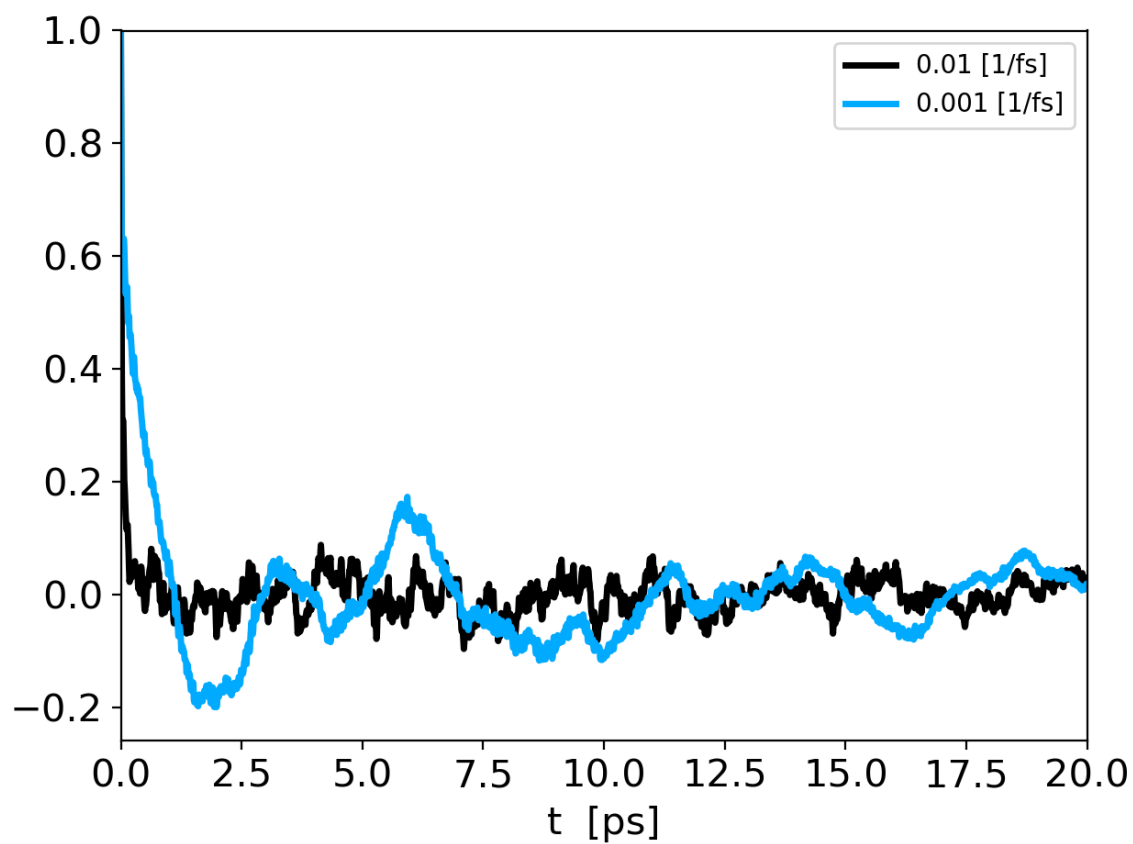

Figure S1: Temperature autocorrelation function obtained from LMD simulations at 3000 K with potential C for two different values of  $\gamma$ :  $0.01 \text{ fs}^{-1}$  in black and  $0.001 \text{ fs}^{-1}$  in blue.

## S3 Rate constants

### S3.1 1-D Morse model

Table S1: Lifetimes in ps for the 1D-Morse as a function of temperature (in K).

| Method                    | 700             | 800             | 900             | 1000            | 1100            | 1200            |
|---------------------------|-----------------|-----------------|-----------------|-----------------|-----------------|-----------------|
| Classical Sum-of-States   | 33.07           | 13.76           | 7.03            | 4.15            | 2.72            | 1.93            |
| Quantum Sum-of-States     | 23.78           | 5.75            | 3.54            | 2.39            | 1.74            | 10.67           |
| LMD ( $\gamma = 0.01$ )   | 48 $\pm$ 1      | 21.9 $\pm$ 0.6  | 11.8 $\pm$ 0.3  | 7.8 $\pm$ 0.2   | 5.0 $\pm$ 0.1   | 3.63 $\pm$ 0.08 |
| RPMD ( $\gamma = 0.01$ )  | 34.1 $\pm$ 0.8  | 15.8 $\pm$ 0.4  | 9.2 $\pm$ 0.2   | 6.3 $\pm$ 0.2   | 4.3 $\pm$ 0.1   | 3.21 $\pm$ 0.09 |
| QTB ( $\gamma = 0.01$ )   | 1.32 $\pm$ 0.06 | 1.22 $\pm$ 0.05 | 1.18 $\pm$ 0.06 | 1.08 $\pm$ 0.05 | 1.03 $\pm$ 0.05 | 0.85 $\pm$ 0.03 |
| LMD ( $\gamma = 0.045$ )  | 48 $\pm$ 1      | 20.5 $\pm$ 0.5  | 10.3 $\pm$ 0.3  | 5.9 $\pm$ 0.1   | 3.88 $\pm$ 0.09 | 2.64 $\pm$ 0.07 |
| RPMD ( $\gamma = 0.045$ ) | 34.3 $\pm$ 0.8  | 15.5 $\pm$ 0.4  | 8.3 $\pm$ 0.2   | 5.1 $\pm$ 0.1   | 3.41 $\pm$ 0.08 | 2.41 $\pm$ 0.06 |
| QTB ( $\gamma = 0.045$ )  | 1.18 $\pm$ 0.05 | 1.01 $\pm$ 0.05 | 0.90 $\pm$ 0.04 | 0.85 $\pm$ 0.04 | 0.75 $\pm$ 0.03 | 0.69 $\pm$ 0.03 |
| LMD ( $\gamma = 0.3$ )    | 149 $\pm$ 4     | 62 $\pm$ 2      | 32.0 $\pm$ 0.9  | 17.9 $\pm$ 0.4  | 10.9 $\pm$ 0.2  | 8.1 $\pm$ 0.2   |
| RPMD ( $\gamma = 0.3$ )   | -               | 48 $\pm$ 1      | 26.6 $\pm$ 0.7  | 15.3 $\pm$ 0.4  | 9.9 $\pm$ 0.2   | 7.0 $\pm$ 0.2   |
| QTB ( $\gamma = 0.3$ )    | 20 $\pm$ 1      | 12.5 $\pm$ 0.8  | 9.3 $\pm$ 0.5   | 6.9 $\pm$ 0.4   | 4.7 $\pm$ 0.2   | 3.6 $\pm$ 0.2   |

Table S2: Rate constants in ps<sup>-1</sup> for the 1D-Morse potential as a function of temperature (in K).

| Method                    | 700     | 800    | 900    | 1000    | 1100   | 1200  |
|---------------------------|---------|--------|--------|---------|--------|-------|
| Classical SoS             | 0.03    | 0.07   | 0.14   | 0.24    | 0.37   | 0.52  |
| Quantum SoS               | 0.04    | 0.17   | 0.28   | 0.42    | 0.57   | 0.09  |
| LMD ( $\gamma = 0.01$ )   | 0.0207  | 0.0456 | 0.0847 | 0.128   | 0.199  | 0.275 |
| RPMD ( $\gamma = 0.01$ )  | 0.0293  | 0.0633 | 0.109  | 0.158   | 0.234  | 0.311 |
| QTB ( $\gamma = 0.01$ )   | 0.756   | 0.819  | 0.849  | 0.924   | 0.965  | 1.17  |
| LMD ( $\gamma = 0.045$ )  | 0.0207  | 0.0488 | 0.0968 | 0.168   | 0.258  | 0.379 |
| RPMD ( $\gamma = 0.045$ ) | 0.0292  | 0.0644 | 0.121  | 0.1958  | 0.293  | 0.415 |
| QTB ( $\gamma = 0.045$ )  | 0.845   | 0.989  | 1.109  | 1.18    | 1.336  | 1.441 |
| LMD ( $\gamma = 0.3$ )    | 0.00669 | 0.0161 | 0.0312 | 0.0559  | 0.0914 | 0.123 |
| RPMD ( $\gamma = 0.3$ )   | -       | 0.0209 | 0.0376 | 0.06538 | 0.100  | 0.143 |
| QTB ( $\gamma = 0.3$ )    | 0.049   | 0.0796 | 0.108  | 0.143   | 0.2099 | 0.280 |

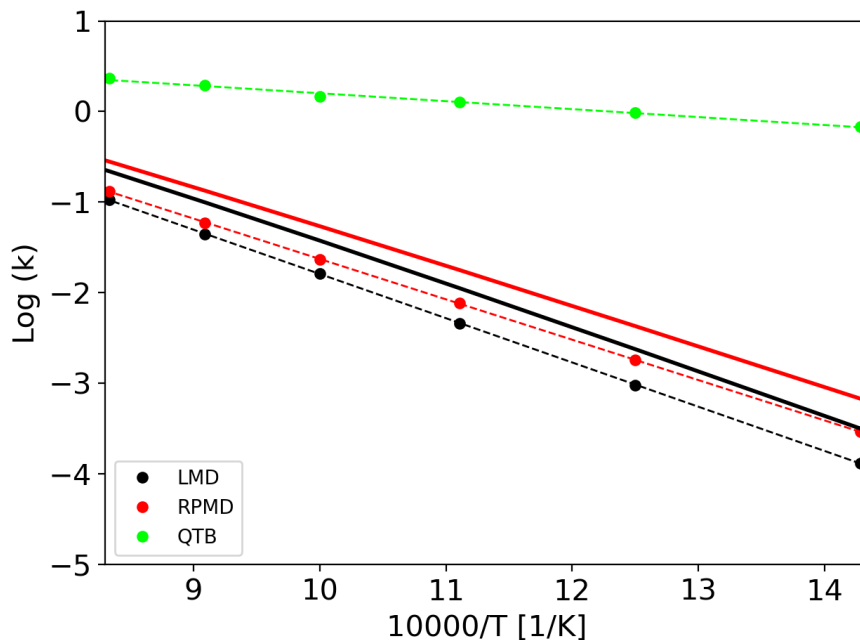

Figure S2: Quantum and classical rate constants as a function of temperature for 1-D Morse. In full lines we report values obtained from sum-of-state approach (both classical and quantum), while results from simulations (with  $\gamma = 0.045 \text{ fs}^{-1}$ ) are reported as dots: LMD (black), RPMD (red) and QTB (green).

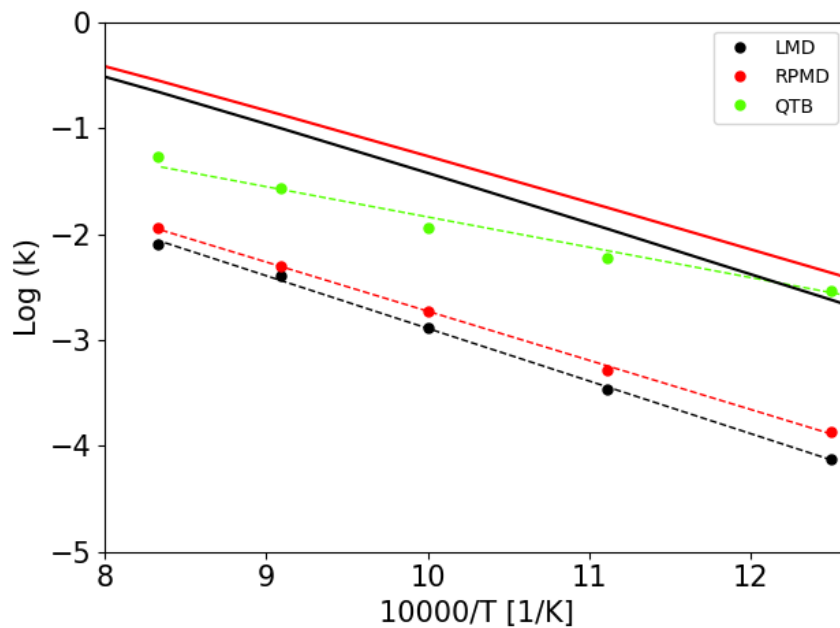

Figure S3: Quantum and classical rate constants as a function of temperature for 1-D Morse. In full lines we report values obtained from sum-of-state approach (both classical and quantum), while results from simulations (with  $\gamma = 0.3 \text{ fs}^{-1}$ ) are reported as dots: LMD (black), RPMD (red) and QTB (green).

## S3.2 Molecular model

Table S3: Lifetimes in ps for the potential A at different temperatures (in K)

| Temperature | LMD       | RPMD      | QTB      |
|-------------|-----------|-----------|----------|
| 3000K       | 844±20    | 771±18    | 278±12   |
| 3500K       | 93±2      | 83±3      | 46±2     |
| 4000K       | 18.2±0.4  | 17.2±0.5  | 12.6±0.6 |
| 4500K       | 5.7±0.1   | 5.6±0.2   | 4.3±0.2  |
| 5000K       | 2.49±0.07 | 2.38±0.07 | 2.1±0.1  |

Table S4: Rate constants in  $\text{ps}^{-1}$  for the potential A as a function of temperature (in K)

| Temperature | LMD     | RPMD    | QTB     |
|-------------|---------|---------|---------|
| 3000K       | 0.00118 | 0.00129 | 0.00359 |
| 3500K       | 0.0107  | 0.0120  | 0.0215  |
| 4000K       | 0.0549  | 0.0581  | 0.0792  |
| 4500K       | 0.175   | 0.178   | 0.233   |
| 5000K       | 0.402   | 0.420   | 0.471   |

Table S5: Lifetimes in ps for the potential B at different temperatures (in K)

| Temperature | LMD      | RPMD     | QTB       |
|-------------|----------|----------|-----------|
| 1350K       | 3460±176 | 2019±94  | 64±3      |
| 1500K       | 646±41   | 392±21   | -         |
| 1700K       | 116±6    | 79±4     | 13.9±0.7  |
| 2000K       | 16.7±0.8 | 14.4±0.7 | 5.9±0.3   |
| 2500K       | 2.5±0.1  | 2.1±0.1  | 0.89±0.04 |

Table S6: Rate constants in  $\text{ps}^{-1}$  for the potential B as a function of temperature.

| Temperature | LMD      | RPMD     | QTB    |
|-------------|----------|----------|--------|
| 1350 K      | 0.000289 | 0.000495 | 0.0157 |
| 1500 K      | 0.00155  | 0.00255  | -      |
| 1700 K      | 0.00859  | 0.0127   | 0.0721 |
| 2000 K      | 0.0600   | 0.0696   | 0.171  |
| 2500 K      | 0.397    | 0.472    | 0.748  |

Table S7: Lifetime in ps for the potential C at different temperatures (in K)

| Temperature | LMD       | RPMD      | QTB       |
|-------------|-----------|-----------|-----------|
| 800K        | 7983±554  | 2267±116  | 8.9 ± 0.4 |
| 1000K       | 287±15    | 116±6     | 4.7±0.2   |
| 1200K       | 30±1      | 17.7±0.9  | 2.7±0.1   |
| 1500K       | 3.7±0.2   | 2.8±0.1   | 1.01±0.05 |
| 1800K       | 1.14±0.06 | 0.83±0.04 | 0.56±0.02 |
| 2000K       | 0.63±0.03 | 0.53±0.03 | -         |

Table S8: Rate constants in  $\text{ps}^{-1}$  for the potential C at different temperatures (in K)

| Temperature | LMD      | RPMD     | QTB   |
|-------------|----------|----------|-------|
| 800K        | 0.000125 | 0.000441 | 0.112 |
| 1000K       | 0.00348  | 0.0086   | 0.212 |
| 1200K       | 0.0336   | 0.0571   | 0.370 |
| 1500K       | 0.271    | 0.351    | 0.986 |
| 1800K       | 0.875    | 1.197    | 1.780 |
| 2000K       | 1.595    | 1.901    | -     |

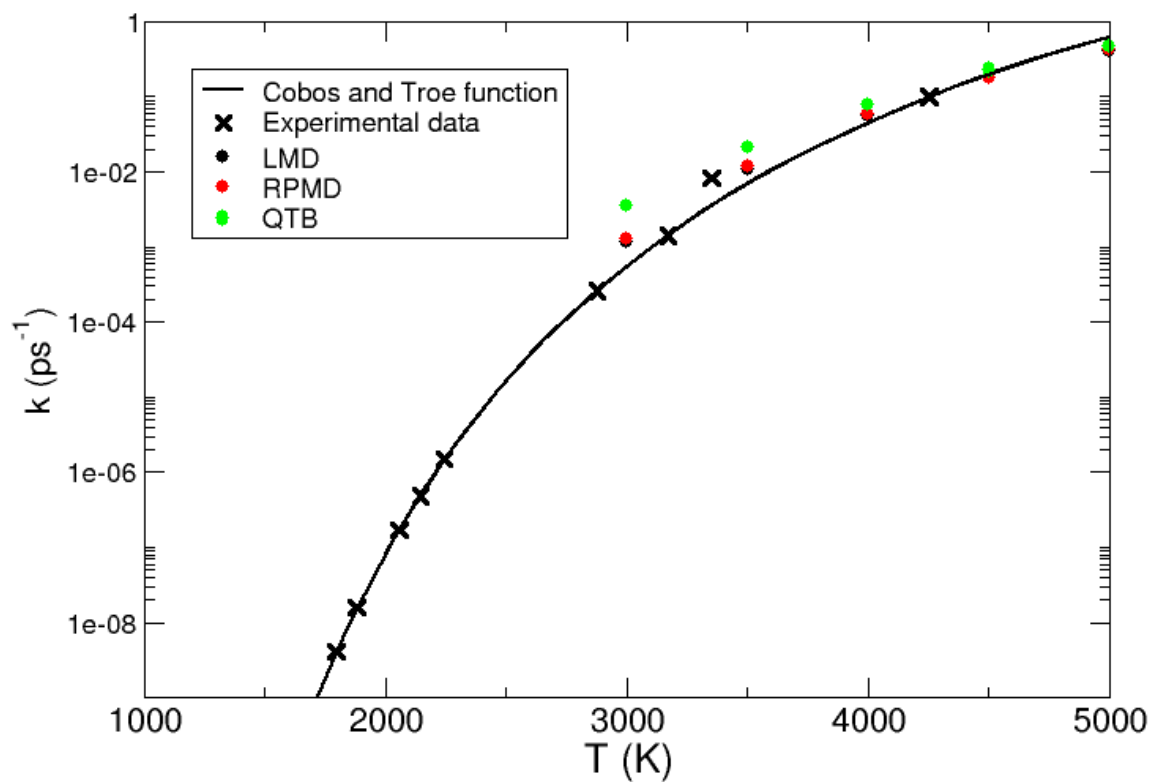

Figure S4: Rate constants for  $\text{CH}_4$  fragmentation as obtained from RPMD, QTB and LMD simulations compared with experimental data and fitted functions as reported by Cobos and Troe.<sup>2,3</sup>



## References

- (1) Ceriotti, M.; Parrinello, M.; Markland, T. E.; Manolopoulos, D. E. Efficient stochastic thermostating of path integral molecular dynamics. *J. Chem. Phys.* **2010**, *133*, 124104.
- (2) Cobos, C. J.; Troe, J. The Dissociation-Recombination System  $\text{CH}_4 + \text{M} \rightarrow \text{CH}_3 + \text{H} + \text{M}$ : Reevaluated Experiments from 300 to 3000 K. *Z. Phys. Chem. (N. F.)* **1990**, *167*, 129–149.
- (3) Cobos, C. J.; Troe, J. The Dissociation-Recombination System  $\text{CH}_4 + \text{M} \rightarrow \text{CH}_3 + \text{H} + \text{M}$ : II. Evaluation of Experiments up to 5000 K and Temperature Dependence of  $\mu E_{\text{c}}$ . *Z. Phys. Chem. (N. F.)* **1992**, *176*, 161–171.
